# Supplementary material for: Enhanced thermal and dielectric properties of CaCu3Ti4O12 by (Fe, La)-co-doping
Source: Royal Society of Chemistry journal article supplement (doi:10.1039/d3tc02598e), 2023-01-01
Supplement: d3tc02598e1.pdf [file d3tc02598e1.pdf]

## Supplemental Materials for

### Enhanced thermal and dielectric properties of $\text{CaCu}_3\text{Ti}_4\text{O}_{12}$ by (Fe,La)-co-doping

Ruifeng Wu<sup>a,b</sup>, Haibing Li<sup>c</sup>, Yafei Liu<sup>a,b</sup>, Aimin Chang<sup>a,\*</sup>, Bo Zhang<sup>a,\*</sup>

<sup>a</sup>*Key Laboratory of Functional Materials and Devices for Special Environments of CAS; Xinjiang Key Laboratory of Electronic Information Materials and Devices; Xinjiang Technical Institute of Physics & Chemistry of CAS, Urumqi, 830011, China*

<sup>b</sup>*Center of Materials Science and Optoelectronics Engineering, University of Chinese Academy of Sciences, Beijing, 100049, China*

<sup>c</sup>*Xinjiang Uygur Autonomous Region Research Institute of Measurement and Testing, Urumqi, 830011, China*

\*Corresponding author.

E-mail address: changam@ms.xjb.ac.cn (Aimin Chang)

zhangbocas@ms.xjb.ac.cn (Bo Zhang)

## Supplementary Tables

**Table S1. The structural parameters of  $\text{Ca}_{1-y}\text{La}_y\text{Cu}_{2.5}\text{Fe}_{0.5}\text{Ti}_4\text{O}_{12}$  samples.**

| Sample                                            | $\text{CaCu}_{2.5}\text{Fe}_{0.5}\text{Ti}_4\text{O}_{12}$ | $\text{Ca}_{0.9}\text{La}_{0.1}\text{Cu}_{2.5}\text{Fe}_{0.5}\text{Ti}_4\text{O}_{12}$ | $\text{Ca}_{0.8}\text{La}_{0.2}\text{Cu}_{2.5}\text{Fe}_{0.5}\text{Ti}_4\text{O}_{12}$ | $\text{Ca}_{0.7}\text{La}_{0.3}\text{Cu}_{2.5}\text{Fe}_{0.5}\text{Ti}_4\text{O}_{12}$ |
|---------------------------------------------------|------------------------------------------------------------|----------------------------------------------------------------------------------------|----------------------------------------------------------------------------------------|----------------------------------------------------------------------------------------|
| <b>A</b>                                          | $a=b=c, \alpha=\beta=\gamma=90^\circ$                      |                                                                                        |                                                                                        |                                                                                        |
| <b>Space group</b>                                | Im-3                                                       |                                                                                        |                                                                                        |                                                                                        |
| <b>Lattice constant (<math>\text{\AA}</math>)</b> | 7.3919(6)                                                  | 7.3959(10)                                                                             | 7.4028(8)                                                                              | 7.4086(9)                                                                              |
| <b>Volume (<math>\text{\AA}^3</math>)</b>         | 403.89(10)                                                 | 404.552(17)                                                                            | 405.691(14)                                                                            | 406.638(15)                                                                            |
| <b>Density (<math>\text{g/cm}^3</math>)</b>       | 5.051                                                      | 5.043                                                                                  | 5.029                                                                                  | 5.017                                                                                  |
| <b><math>R_{\text{WP}}</math> (%)</b>             | 5.82                                                       | 6.53                                                                                   | 6.17                                                                                   | 6.7                                                                                    |
| <b><math>R_{\text{P}}</math> (%)</b>              | 4.47                                                       | 5.02                                                                                   | 4.59                                                                                   | 4.88                                                                                   |
| <b><math>\chi^2</math></b>                        | 1.71                                                       | 2.16                                                                                   | 1.87                                                                                   | 2.21                                                                                   |

## Supplementary Figures

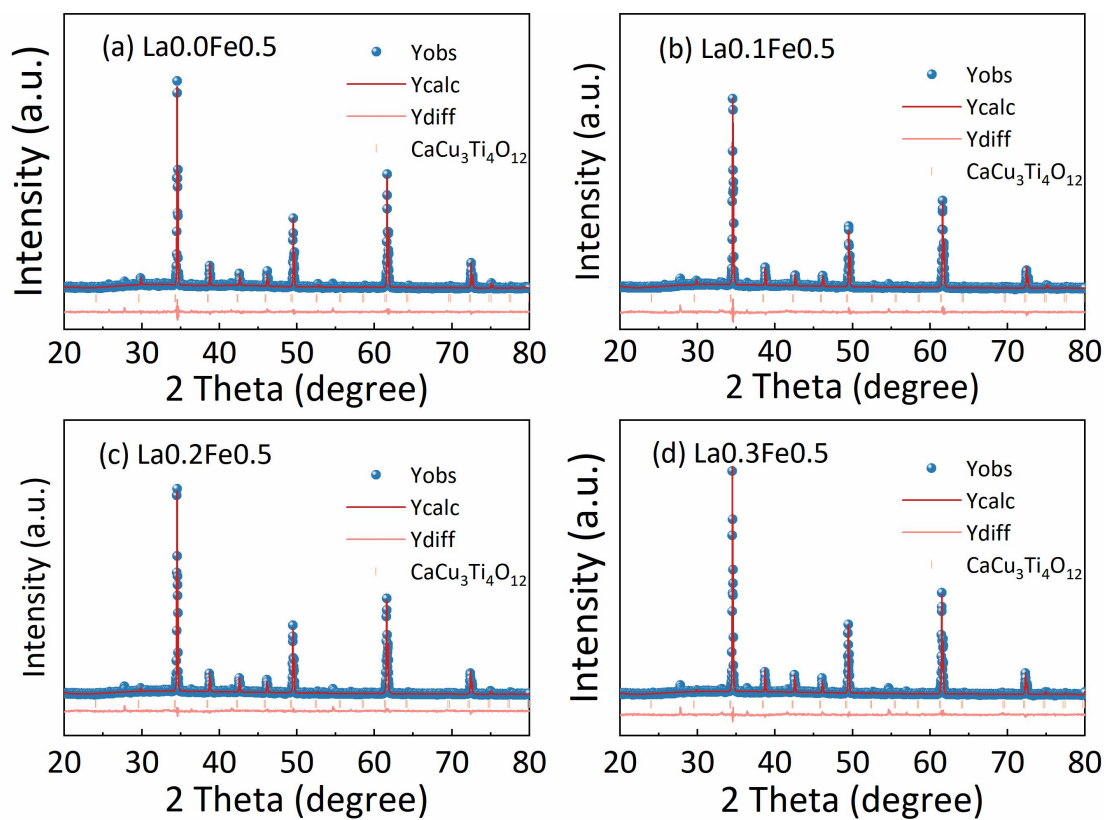

Figure S1. Rietveld refinement results for the  $\text{Ca}_{1-y}\text{La}_y\text{Cu}_{2.5}\text{Fe}_{0.5}\text{Ti}_4\text{O}_{12}$  samples. (a)  $\text{La}_{0.0}\text{Fe}_{0.5}$ , (b)  $\text{La}_{0.1}\text{Fe}_{0.5}$ , (c)  $\text{La}_{0.2}\text{Fe}_{0.5}$  and (d)  $\text{La}_{0.3}\text{Fe}_{0.5}$ .

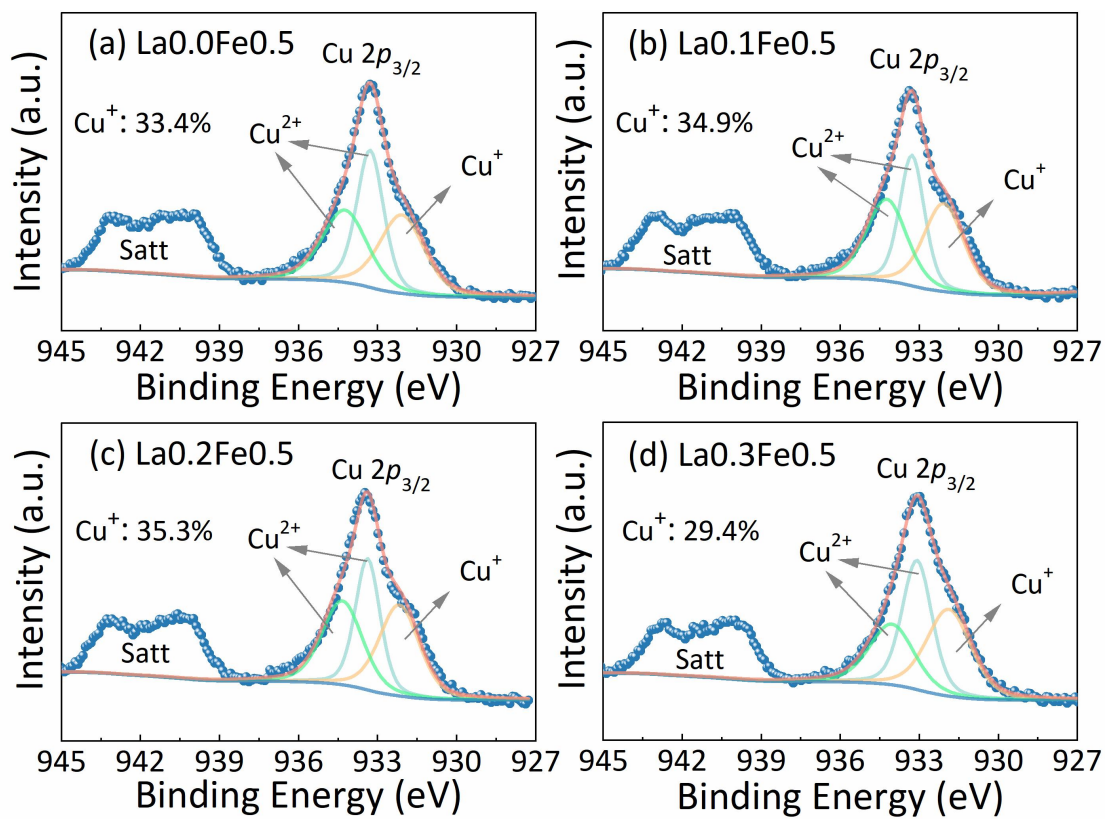

Figure S2. XPS spectrum and fitting curves of Cu 2p spectrum for Ca<sub>1-y</sub>La<sub>y</sub>Cu<sub>2.5</sub>Fe<sub>0.5</sub>Ti<sub>4</sub>O<sub>12</sub> samples. (a) La<sub>0.0</sub>Fe<sub>0.5</sub>, (b) La<sub>0.1</sub>Fe<sub>0.5</sub>, (c) La<sub>0.2</sub>Fe<sub>0.5</sub> and (d) La<sub>0.3</sub>Fe<sub>0.5</sub>.

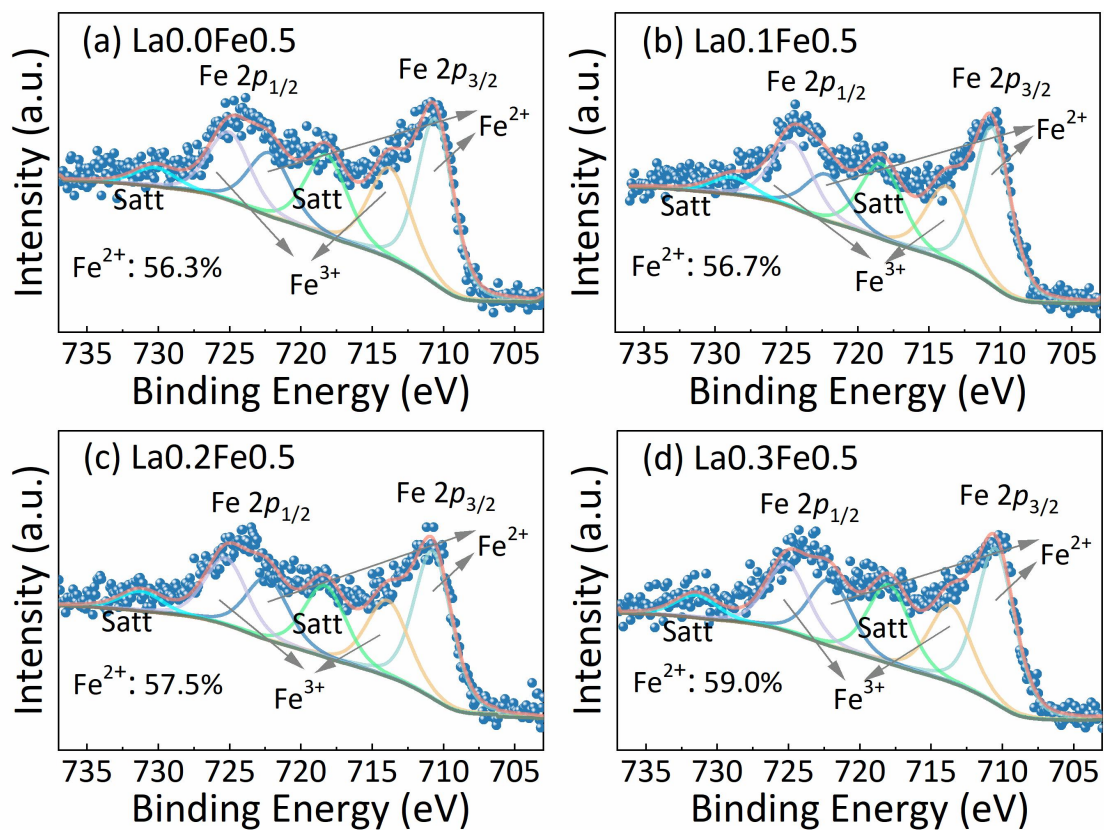

Figure S3. XPS spectrum and fitting curves of Fe 2p spectrum for  $\text{Ca}_{1-y}\text{La}_y\text{Cu}_{2.5}\text{Fe}_{0.5}\text{Ti}_4\text{O}_{12}$  samples. (a) La<sub>0.0</sub>Fe<sub>0.5</sub>, (b) La<sub>0.1</sub>Fe<sub>0.5</sub>, (c) La<sub>0.2</sub>Fe<sub>0.5</sub> and (d) La<sub>0.3</sub>Fe<sub>0.5</sub>.

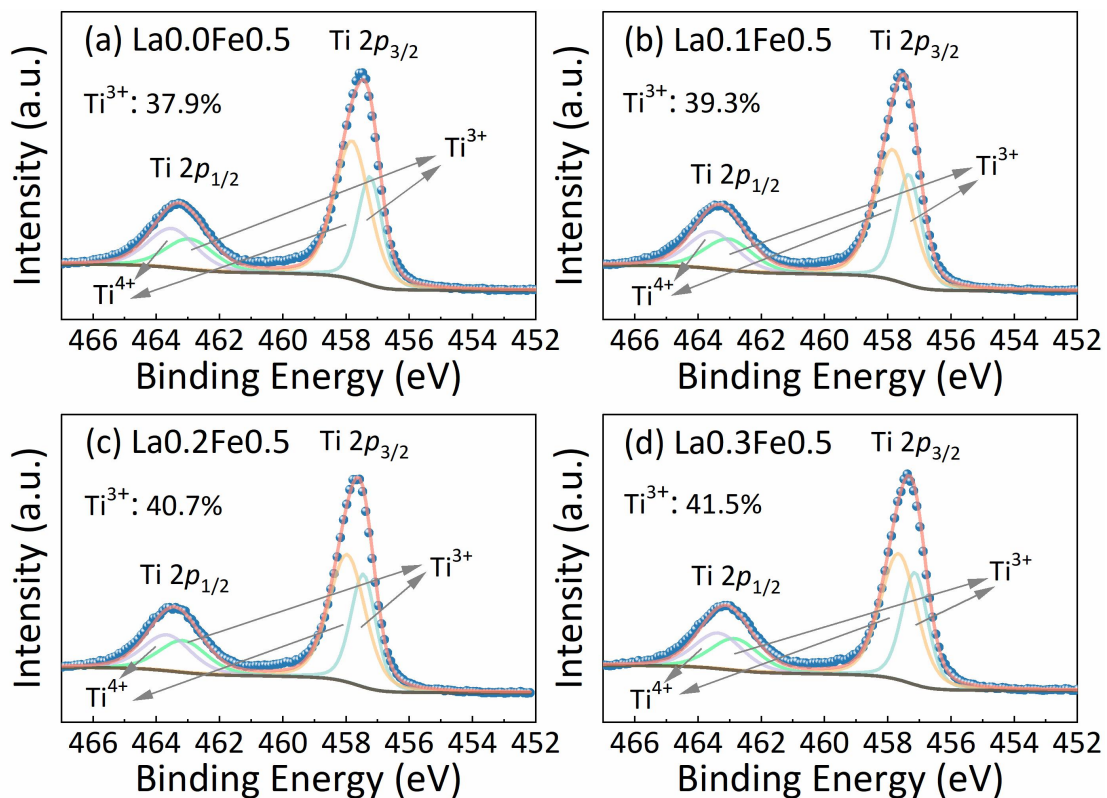

Figure S4. XPS spectrum and fitting curves of Ti 2p spectrum for  $\text{Ca}_{1-y}\text{La}_y\text{Cu}_{2.5}\text{Fe}_{0.5}\text{Ti}_4\text{O}_{12}$  samples. (a) La<sub>0.0</sub>Fe<sub>0.5</sub>, (b) La<sub>0.1</sub>Fe<sub>0.5</sub>, (c) La<sub>0.2</sub>Fe<sub>0.5</sub> and (d) La<sub>0.3</sub>Fe<sub>0.5</sub>.

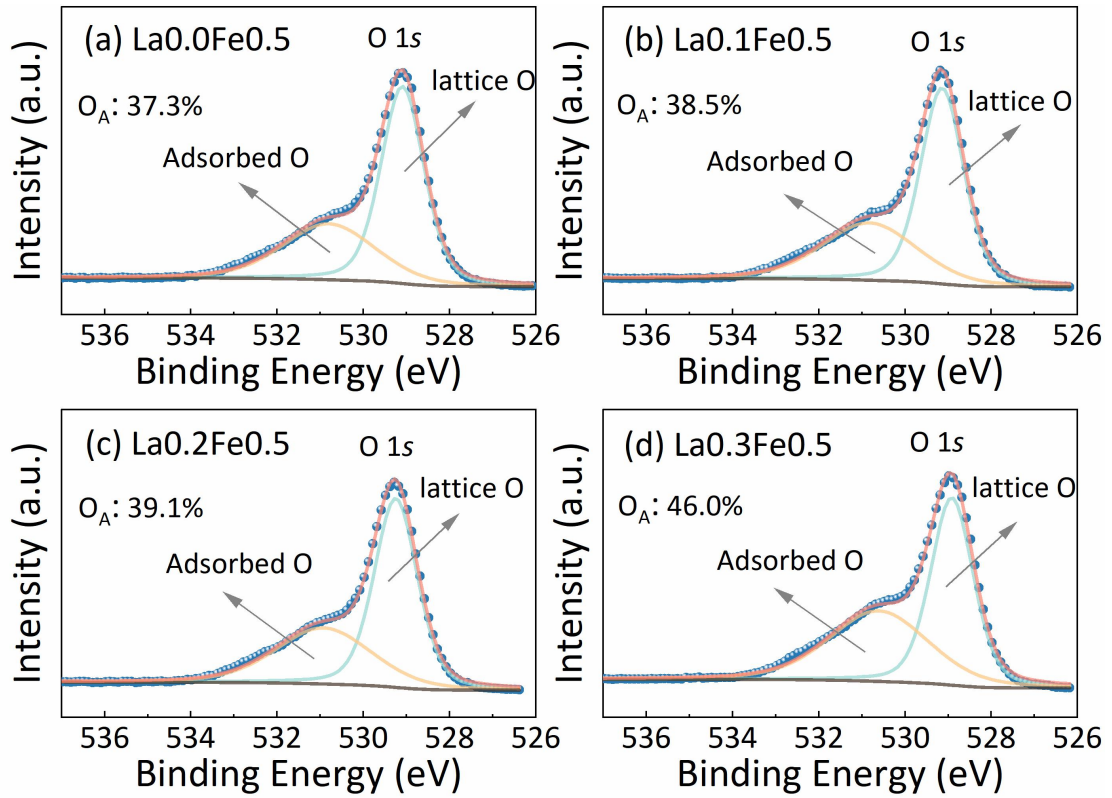

Figure S5. XPS spectrum and fitting curves of O 1s spectrum for  $\text{Ca}_{1-y}\text{La}_y\text{Cu}_{2.5}\text{Fe}_{0.5}\text{Ti}_4\text{O}_{12}$  samples. (a)  $\text{La}_{0.0}\text{Fe}_{0.5}$ , (b)  $\text{La}_{0.1}\text{Fe}_{0.5}$ , (c)  $\text{La}_{0.2}\text{Fe}_{0.5}$  and (d)  $\text{La}_{0.3}\text{Fe}_{0.5}$ .

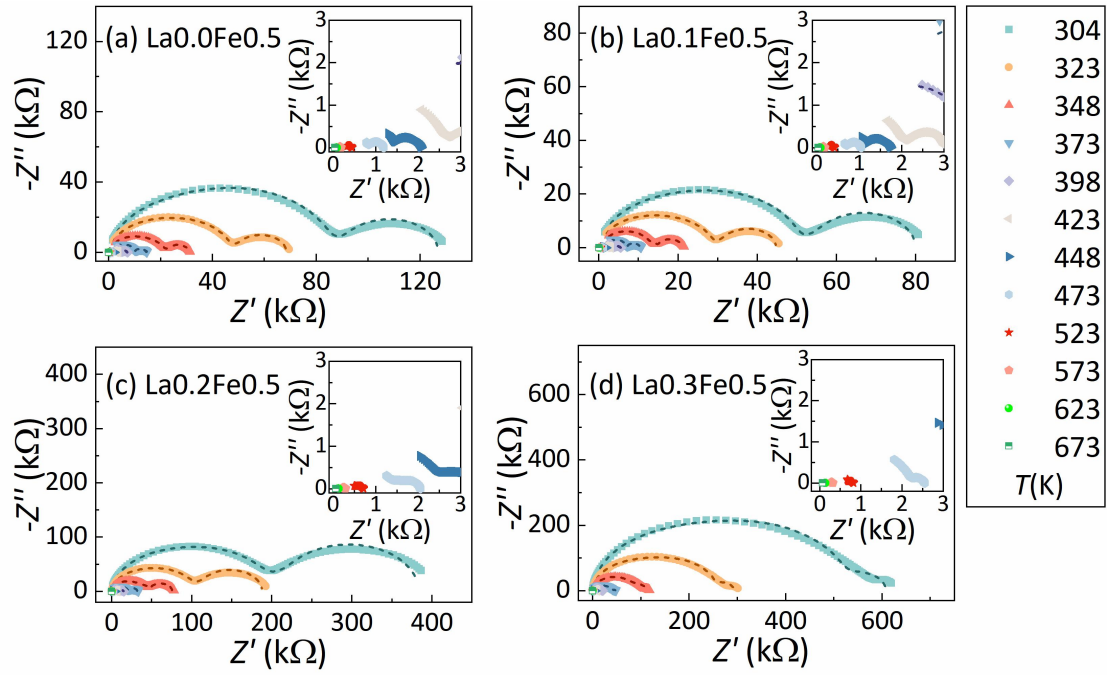

**Figure S6. Impedance spectrum of the  $\text{Ca}_{1-y}\text{La}_y\text{Cu}_{2.5}\text{Fe}_{0.5}\text{Ti}_4\text{O}_{12}$  samples in the different temperature range of 304–673 K. (a)  $\text{La}_{0.0}\text{Fe}_{0.5}$ , (b)  $\text{La}_{0.1}\text{Fe}_{0.5}$ , (c)  $\text{La}_{0.2}\text{Fe}_{0.5}$  and (d)  $\text{La}_{0.3}\text{Fe}_{0.5}$ .**



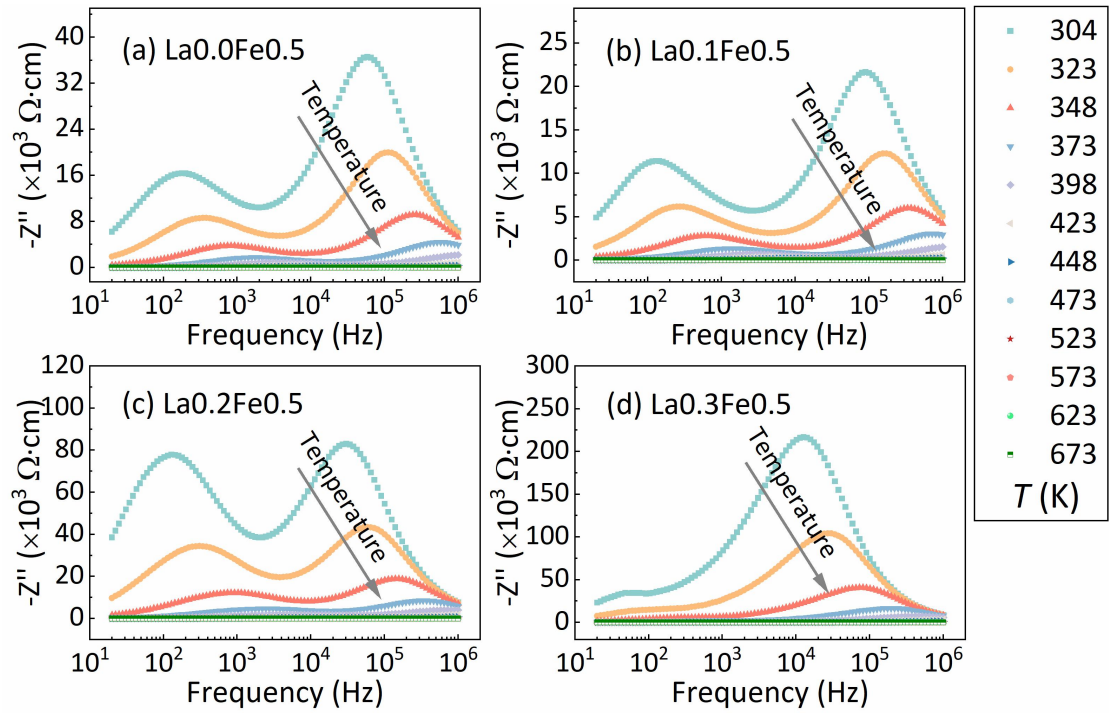

**Figure S7.** Frequency dependence of  $Z''$  for the  $\text{Ca}_{1-y}\text{La}_y\text{Cu}_{2.5}\text{Fe}_{0.5}\text{Ti}_4\text{O}_{12}$  samples. (a)  $\text{La}_{0.0}\text{Fe}_{0.5}$ , (b)  $\text{La}_{0.1}\text{Fe}_{0.5}$ , (c)  $\text{La}_{0.2}\text{Fe}_{0.5}$  and (d)  $\text{La}_{0.3}\text{Fe}_{0.5}$ .

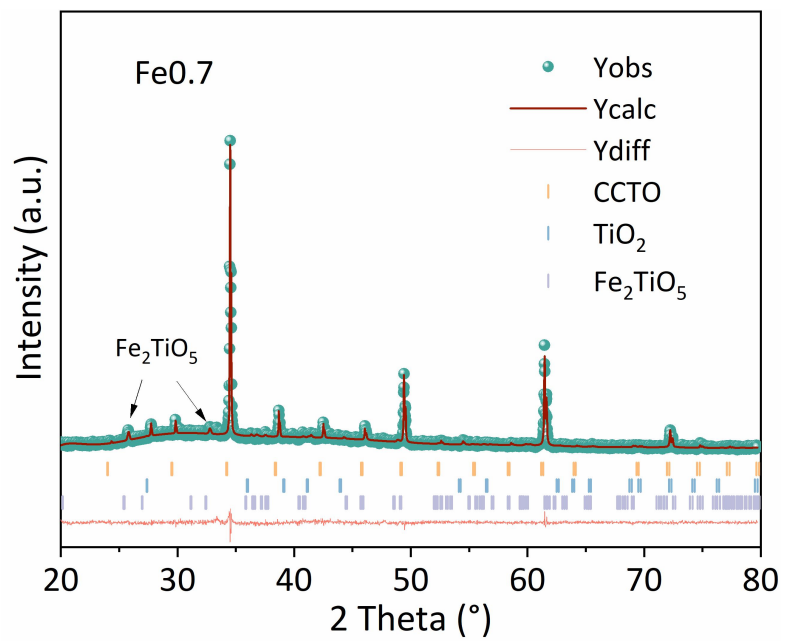

Figure S8. Rietveld refinement results for the  $\text{CaCu}_{2.3}\text{Fe}_{0.7}\text{Ti}_4\text{O}_{12}$  samples.
